# Supplementary material for: Lyophilized and gamma-sterilized allogeneic bone implant used as a spacer for advancement of a modified tibial tuberosity in the treatment of cranial cruciate ligament disease in dogs
Source: PLoS One. 2019 Aug 5;14(8):e0220291. doi: 10.1371/journal.pone.0220291 (PMC6681943; doi:10.1371/journal.pone.0220291)
Supplement: S2 Table — (XLSX) [file pone.0220291.s002.xlsx]

## Sheet: BU
Avaliação radiográfica
União Óssea
		Dara	Bruce	Laila	Yuri	Puma	Vanille	Kurama	Natacha	Buma	Era	Luna	Liu	Maia E	Maia D	Eva	Anita
PO	Cranial	0	0	0	0	0	0	0	0	0	0	0	0	0	0	0	0
	Caudal	0	0	0	0	0	0	0	0	0	0	0	0	0	0	0	0	Média	Min	Máx
	SOMA	0	0	0	0	0	0	0	0	0	0	0	0	0	0	0	0	0	0	0
30	Cranial	3	1	1	0	3	1	1	1	2	1	3	2	1	3	3	3
	Caudal	3	1	1	1	1	1	2	1	1	1	3	2	3	3	3	1	Média	Min	Máx
	SOMA	6	2	2	1	4	2	3	2	3	2	6	4	4	6	6	4	3.5625	1	6
60	Cranial	3	1	3	3	3	3	3	3	2	2	3	3	2	3	3	3
	Caudal	3	3	2	3	3	3	3	3	2	2	3	3	3	3	3	3	Média	Min	Máx
	SOMA	6	4	5	6	6	6	6	6	4	4	6	6	5	6	6	6	5.5	4	6
90	Cranial	3	3	3	3	3	3	3	1	2	2	3	3	3	3	3	3
	Caudal	3	3	3	3	3	3	3	1	2	2	3	3	3	3	3	3	Média	Min	Máx
	SOMA	6	6	6	6	6	6	6	2	4	4	6	6	6	6	6	6	5.5	2	6
				0
120	Cranial	3	3		3	3	3	3	1	2	2	3	3	3	3	3	3
	Caudal	3	3		3	3	3	3	1	2	2	3	3	3	3	3	3	Média	Min	Máx
	SOMA	6	6		6	6	6	6	2	4	4	6	6	6	6	6	6	5.46667	2	6
						momento/score	0	1	2	3	4	5	6
		União Óssea				PO	16	0	0	0	0	0	0	16
		Mediana	Min-Máx			30	0	1	5	2	4	0	4	16
	PO	0	(0-0)	c		60	0	0	0	0	3	2	11	16
	8 semanas	3.5	(1-6)	b		90	0	0	1	0	2	0	13	16
	12 semanas	6	(4-6)	a		120	0	0	1	0	2	0	12	15
	16 semanas	6	(4-6)	a			16	1	7	2	11	2	40
	20 semanas	6	(2-6)	a
						momento/score	0	1	2	3	4	5	6
						PO	16	0	0	0	0	0	0	16
						30	0	1	5	2	4	0	6	18
						60	0	0	0	0	3	2	11	16
						90	0	0	1	0	2	0	13	16
						120	0	0	1	0	2	0	12	15

## Sheet: Estatística BU
Tabela ? Comparacoes multiplas dos escore das uniáo ossea avalidada radiograficamente nos diferentes momentos. Local e data.
Momentos	União Óssea
	Mediana1		Amplitude
PO	0	c	(0-0)
8 semanas	3.5	b	(1-6)
12 semanas	6	a	(4-6)
16 semanas	6	a	(4-6)
20 semanas	6	a	(2-6)
Valor do teste Kruskal-Wallis	106.81
Probabilidade de siginificancia	<0,0001
1: Valores seguidos pela mesma letra, na coluna, nao diferem entre si pelo teste de Krukal-Wallis (p≥0,05)
					Momentos (dias)	Mediana	Amplitude (máx-mín)
					Pós - operatório imediato	0 c	(0-0)
					30	3,5b	(1-6)
					60	6a	(4-6)
					90	6a	(4-6)
					120	6a	(2-6)
					Valor do teste de Kruskal-Wallis		106.81
					Probabilidade de significância		<0,0001
					* Valores seguidos pela mesma letra, na coluna, nao diferem entre si pelo teste de Krukal-Wallis (p≥0,05)
